# Supplementary material for: Ubiquitous LEA29Y Expression Blocks T Cell Co-Stimulation but Permits Sexual Reproduction in Genetically Modified Pigs
Source: PubMed Central journal article supplement (PMC4866763; doi:10.1371/journal.pone.0155676), 2016-05-13
Supplement: pone.0155676.s003.pdf [file pone.0155676.s003.pdf]

**S1 Table. Oligo nucleotides.**

**EH53** 5'-

AATTAAGCTTGGATCCATGCATGTATACGCTAGCGGCCGCGTCGACGAATTC

**EH35** 5'-

GGCCGAATTCGTCGACGCGGCCGCTAGCGTATACATGCATGGATCCAAGCTT

**NK53** 5'-

GGCCGGCGCGCCTTAATTAAGTGCAGAACTGAAGATCTATGCATATCTGGTCTAG  
AGGCGCGCCTTAATTAA

**NK35** 5'-

GTACTTAATTAAGGCGCGCCTCTAGACCAGATATGCATAGATCTTCAGTTCTGCA  
GTTAATTAAGGCGCGCC

**LEAf** 5'- CCAGCACCTGAACTCCTG

**NEOr** 5'- TGATTCCCACTTTGTGGTTC

**ACTf** 5'- CGCTCGTGGTCGACAACG

**ACTr** 5'- CTGGATGGCCACGTACATG
